# Supplementary material for: Cognitive Experiences Reported by Patients With Borderline Personality Disorder and Axis II Comparison Subjects: A 16-Year Prospective Follow-Up Study
Source: Atypon-hosted journal article supplement (doi:10.1176/appi.ajp.2013.13010055), 2013-04-05
Supplement: 671_ds001.pdf [file 671_ds001.pdf]

| Table 1: Prevalence of Odd Thinking in Borderline Patients and Axis II Comparison Subject over 16 Years of Prospective Follow-up |               |               |               |              |              |              |              |              |               |                          |                            |                              |
|----------------------------------------------------------------------------------------------------------------------------------|---------------|---------------|---------------|--------------|--------------|--------------|--------------|--------------|---------------|--------------------------|----------------------------|------------------------------|
|                                                                                                                                  | BL            | 2 YR FU       | 4 YR FU       | 6 YR FU      | 8 YR FU      | 10 YR FU     | 12 YR FU     | 14 YR FU     | 16 YR FU      | RRR<br>Diagnosis<br>Time | 95%CI<br>Diagnosis<br>Time | P-value<br>Diagnosis<br>Time |
| <b>Any Odd Thinking</b>                                                                                                          |               |               |               |              |              |              |              |              |               |                          |                            |                              |
| BPD                                                                                                                              | 85.5<br>(248) | 65.8<br>(181) | 48.0<br>(129) | 33.0<br>(87) | 25.9<br>(66) | 26.1<br>(65) | 35.3<br>(86) | 32.8<br>(78) | 37.2<br>(86)  | 1.92<br>0.26             | 1.55, 2.39<br>0.22, 0.32   | <0.001<br><0.001             |
| OPD                                                                                                                              | 54.2<br>(39)  | 29.9<br>(20)  | 20.3<br>(13)  | 14.3<br>(9)  | 8.1<br>(5)   | 8.2<br>(5)   | 11.7<br>(7)  | 15.3<br>(9)  | 15.5<br>(9)   |                          |                            |                              |
| <b>Marked Superstitiousness</b>                                                                                                  |               |               |               |              |              |              |              |              |               |                          |                            |                              |
| BPD                                                                                                                              | 21.4<br>(62)  | 13.8<br>(38)  | 11.9<br>(32)  | 14.4<br>(38) | 6.3<br>(16)  | 2.8<br>(7)   | 9.4<br>(23)  | 13.0<br>(31) | 12.12<br>(28) | 1.96<br>0.50             | 1.11, 3.47<br>0.36, 0.70   | NS<br><0.001                 |
| OPD                                                                                                                              | 12.5<br>(9)   | 6.0<br>(4)    | 3.1<br>(2)    | 6.4<br>(4)   | 4.8<br>(3)   | 1.6<br>(1)   | 1.7<br>(1)   | 5.1<br>(3)   | 3.5<br>(2)    |                          |                            |                              |
| <b>Magical Thinking</b>                                                                                                          |               |               |               |              |              |              |              |              |               |                          |                            |                              |
| BPD                                                                                                                              | 16.6<br>(48)  | 10.9<br>(30)  | 10.0<br>(27)  | 7.6<br>(20)  | 7.5<br>(19)  | 7.2<br>(18)  | 6.2<br>(15)  | 7.6<br>(18)  | 8.2<br>(19)   | 4.13<br>0.43             | 1.74, 9.79<br>0.26, 0.69   | 0.001<br><0.001              |
| OPD                                                                                                                              | 6.9<br>(5)    | 1.5<br>(1)    | 1.6<br>(1)    | 1.6<br>(1)   | 0.0<br>(0)   | 0.0<br>(0)   | 0.0<br>(0)   | 1.7<br>(1)   | 0.0<br>(0)    |                          |                            |                              |
| <b>Sixth Sense</b>                                                                                                               |               |               |               |              |              |              |              |              |               |                          |                            |                              |
| BPD                                                                                                                              | 21.7<br>(63)  | 13.1<br>(36)  | 15.2<br>(41)  | 13.3<br>(35) | 5.9<br>(15)  | 6.8<br>(17)  | 7.0<br>(17)  | 8.4<br>(20)  | 8.7<br>(20)   | 2.06<br>0.33             | 1.16, 3.82<br>0.22, 0.49   | NS<br><0.001                 |
| OPD                                                                                                                              | 11.1<br>(8)   | 4.5<br>(3)    | 6.3<br>(4)    | 6.4<br>(4)   | 3.2<br>(2)   | 1.6<br>(1)   | 3.3<br>(2)   | 1.7<br>(1)   | 3.6<br>(2)    |                          |                            |                              |
| <b>Telepathy</b>                                                                                                                 |               |               |               |              |              |              |              |              |               |                          |                            |                              |
| BPD                                                                                                                              | 4.5<br>(13)   | 1.5<br>(4)    | 4.1<br>(11)   | 2.7<br>(7)   | 0.8<br>(2)   | 1.6<br>(4)   | 1.2<br>(3)   | 0.0<br>(0)   | 1.3<br>(3)    | 1.55<br>0.18             | 0.38, 6.30<br>0.07, 0.48   | NS<br>0.001                  |
| OPD                                                                                                                              | 2.8<br>(2)    | 1.5<br>(1)    | 1.6<br>(1)    | 1.6<br>(1)   | 1.6<br>(1)   | 0.0<br>(0)   | 0.0<br>(0)   | 0.0<br>(0)   | 1.7<br>(2)    |                          |                            |                              |
| <b>Clairvoyance</b>                                                                                                              |               |               |               |              |              |              |              |              |               |                          |                            |                              |
| BPD                                                                                                                              | 12.8<br>(37)  | 7.3<br>(20)   | 3.7<br>(10)   | 4.6<br>(12)  | 1.2<br>(3)   | 1.6<br>(4)   | 3.7<br>(9)   | 2.1<br>(5)   | 3.9<br>(9)    | 1.37<br>0.20             | 0.60, 3.13<br>0.10, 0.39   | NS<br><0.001                 |
| OPD                                                                                                                              | 4.2<br>(3)    | 6.0<br>(4)    | 4.7<br>(3)    | 4.8<br>(3)   | 3.2<br>(2)   | 0.0<br>(0)   | 1.7<br>(1)   | 3.4<br>(2)   | 1.7<br>(1)    |                          |                            |                              |
| <b>Overvalued Ideas</b>                                                                                                          |               |               |               |              |              |              |              |              |               |                          |                            |                              |
| BPD                                                                                                                              | 75.2<br>(218) | 54.2<br>(149) | 30.9<br>(83)  | 19.3<br>(51) | 14.5<br>(37) | 18.9<br>(47) | 24.6<br>(60) | 21.0<br>(50) | 21.2<br>(49)  | 2.10<br>0.16             | 1.64, 2.68<br>0.12, 0.21   | <0.001<br><0.001             |
| OPD                                                                                                                              | 43.1<br>(31)  | 20.9<br>(14)  | 12.5<br>(8)   | 4.8<br>(3)   | 3.2<br>(2)   | 8.2<br>(5)   | 8.3<br>(5)   | 6.8<br>(4)   | 6.9<br>(4)    |                          |                            |                              |

**Table 2: Prevalence of Unusual Perceptual Experiences in Borderline Patients and Axis II Comparison Subject over 16 Years of Prospective Follow-up**

|                                | BL            | 2 YR FU       | 4 YR FU       | 6 YR FU      | 8 YR FU      | 10 YR FU     | 12 YR FU     | 14 YR FU     | 16 YR FU     | RRR<br>Diagnosis<br>Time | 95%CI<br>Diagnosis<br>Time | P-value<br>Diagnosis<br>Time |
|--------------------------------|---------------|---------------|---------------|--------------|--------------|--------------|--------------|--------------|--------------|--------------------------|----------------------------|------------------------------|
| <b>Any Unusual Perceptions</b> |               |               |               |              |              |              |              |              |              |                          |                            |                              |
| BPD                            | 76.2<br>(221) | 58.2<br>(160) | 47.2<br>(127) | 34.1<br>(90) | 32.2<br>(82) | 27.3<br>(68) | 25.8<br>(63) | 24.0<br>(57) | 26.4<br>(61) | 2.27<br>0.24             | 1.66, 3.12<br>0.20, 0.30   | <0.001<br><0.001             |
| OPD                            | 27.8<br>(20)  | 31.3<br>(21)  | 12.5<br>(8)   | 7.9<br>(5)   | 12.9<br>(8)  | 9.8<br>(6)   | 6.7<br>(4)   | 1.7<br>(1)   | 1.7<br>(1)   |                          |                            |                              |
| <b>Recurrent Illusions</b>     |               |               |               |              |              |              |              |              |              |                          |                            |                              |
| BPD                            | 32.8<br>(95)  | 17.5<br>(48)  | 10.8<br>(29)  | 11.7<br>(31) | 7.5<br>(19)  | 4.8<br>(12)  | 8.2<br>(20)  | 6.3<br>(15)  | 5.2<br>(12)  | 3.55<br>0.13             | 1.99, 6.35<br>0.84, 0.21   | <0.001<br><0.001             |
| OPD                            | 4.2<br>(3)    | 7.5<br>(5)    | 3.1<br>(2)    | 4.8<br>(3)   | 3.2<br>(2)   | 4.9<br>(3)   | 0.0<br>(0)   | 0.0<br>(0)   | 0.0<br>(0)   |                          |                            |                              |
| <b>Depersonalization</b>       |               |               |               |              |              |              |              |              |              |                          |                            |                              |
| BPD                            | 59.7<br>(173) | 48.7<br>(134) | 39.0<br>(105) | 26.1<br>(69) | 28.6<br>(73) | 24.1<br>(60) | 18.4<br>(45) | 18.5<br>(44) | 22.1<br>(51) | 2.27<br>0.26             | 1.57, 3.28<br>0.21, 0.33   | <0.001<br><0.001             |
| OPD                            | 25.0<br>(18)  | 20.9<br>(14)  | 10.9<br>(7)   | 4.8<br>(3)   | 9.7<br>(6)   | 4.9<br>(3)   | 3.3<br>(2)   | 1.7<br>(1)   | 1.7<br>(1)   |                          |                            |                              |
| <b>Derealization</b>           |               |               |               |              |              |              |              |              |              |                          |                            |                              |
| BPD                            | 60.3<br>(175) | 45.1<br>(124) | 36.4<br>(98)  | 25.8<br>(68) | 22.8<br>(58) | 17.7<br>(44) | 15.6<br>(38) | 17.7<br>(42) | 20.4<br>(47) | 3.49<br>0.22             | 2.24, 5.44<br>0.17, 0.29   | <0.001<br><0.001             |
| OPD                            | 16.7<br>(12)  | 14.9<br>(10)  | 4.7<br>(3)    | 4.8<br>(3)   | 4.8<br>(3)   | 4.9<br>(3)   | 5.0<br>(3)   | 0.0<br>(0)   | 1.7<br>(1)   |                          |                            |                              |

**Table 3: Prevalence of Paranoid Experiences in Borderline Patients and Axis II Comparison Subject over 16 Years of Prospective Follow-up**

|                                   | BL            | 2 YR FU       | 4 YR FU       | 6 YR FU       | 8 YR FU       | 10 YR FU      | 12 YR FU      | 14 YR FU     | 16 YR FU      | RRR<br>Diagnosis<br>Time | 95%CI<br>Diagnosis<br>Time | P-value<br>Diagnosis<br>Time |
|-----------------------------------|---------------|---------------|---------------|---------------|---------------|---------------|---------------|--------------|---------------|--------------------------|----------------------------|------------------------------|
| <b>Any Nondelusional Paranoia</b> |               |               |               |               |               |               |               |              |               |                          |                            |                              |
| BPD                               | 86.6<br>(251) | 69.5<br>(191) | 62.1<br>(167) | 57.6<br>(152) | 45.1<br>(115) | 42.6<br>(106) | 43.9<br>(107) | 38.2<br>(91) | 43.3<br>(100) | 2.01<br>0.42             | 1.62, 2.51<br>0.37, 0.48   | <0.001<br><0.001             |
| OPD                               | 43.1<br>(31)  | 38.8<br>(26)  | 34.4<br>(22)  | 22.2<br>(14)  | 24.2<br>(15)  | 21.3<br>(13)  | 13.3<br>(8)   | 18.6<br>(11) | 20.7<br>(12)  |                          |                            |                              |
| <b>Undue Suspiciousness</b>       |               |               |               |               |               |               |               |              |               |                          |                            |                              |
| BPD                               | 71.4<br>(207) | 58.6<br>(161) | 54.3<br>(146) | 46.2<br>(122) | 35.3<br>(90)  | 31.7<br>(79)  | 35.7<br>(87)  | 31.9<br>(76) | 37.2<br>(86)  | 2.29<br>0.43             | 1.74, 3.02<br>0.37, 0.50   | <0.001<br><0.001             |
| OPD                               | 29.2<br>(21)  | 26.9<br>(18)  | 28.1<br>(18)  | 17.5<br>(11)  | 21.0<br>(13)  | 13.1<br>(8)   | 11.7<br>(7)   | 17.0<br>(10) | 19.0<br>(11)  |                          |                            |                              |
| <b>Ideas of Reference</b>         |               |               |               |               |               |               |               |              |               |                          |                            |                              |
| BPD                               | 61.7<br>(179) | 43.3<br>(119) | 37.9<br>(102) | 33.0<br>(87)  | 27.5<br>(70)  | 24.5<br>(61)  | 24.6<br>(60)  | 21.0<br>(50) | 28.6<br>(66)  | 2.28<br>0.35             | 1.69, 3.06<br>0.29, 0.43   | <0.001<br><0.001             |
| OPD                               | 27.8<br>(20)  | 20.9<br>(14)  | 10.9<br>(7)   | 14.3<br>(9)   | 11.3<br>(7)   | 13.1<br>(8)   | 6.7<br>(4)    | 8.5<br>(5)   | 6.9<br>(4)    |                          |                            |                              |
| <b>Other Paranoid Ideation</b>    |               |               |               |               |               |               |               |              |               |                          |                            |                              |
| BPD                               | 51.7<br>(150) | 34.9<br>(96)  | 33.8<br>(91)  | 23.5<br>(62)  | 12.2<br>(31)  | 13.3<br>(33)  | 13.5<br>(33)  | 16.4<br>(39) | 17.8<br>(41)  | 3.06<br>0.24             | 2.25, 4.58<br>0.19, 0.33   | <0.001<br><0.001             |
| OPD                               | 9.7<br>(7)    | 11.9<br>(8)   | 14.1<br>(9)   | 9.5<br>(6)    | 12.9<br>(8)   | 9.8<br>(6)    | 5.0<br>(3)    | 5.1<br>(3)   | 10.3<br>(6)   |                          |                            |                              |

| Table 4: Prevalence of Quasi-Psychotic Thought in Borderline Patients and Axis II Comparison Subject over 16 Years of Prospective Follow-up |               |              |              |              |             |              |              |             |             |                          |                            |                              |
|---------------------------------------------------------------------------------------------------------------------------------------------|---------------|--------------|--------------|--------------|-------------|--------------|--------------|-------------|-------------|--------------------------|----------------------------|------------------------------|
|                                                                                                                                             | BL            | 2 YR FU      | 4 YR FU      | 6 YR FU      | 8 YR FU     | 10 YR FU     | 12 YR FU     | 14 YR FU    | 16 YR FU    | RRR<br>Diagnosis<br>Time | 95%CI<br>Diagnosis<br>Time | P-value<br>Diagnosis<br>Time |
| <b>Any Quasi-psychotic Thought</b>                                                                                                          |               |              |              |              |             |              |              |             |             |                          |                            |                              |
| BPD                                                                                                                                         | 56.6<br>(164) | 34.9<br>(96) | 33.8<br>(91) | 19.7<br>(52) | 8.6<br>(22) | 13.3<br>(33) | 13.9<br>(34) | 5.9<br>(14) | 7.4<br>(17) | 3.24<br>0.09             | 2.00, 5.24<br>0.07, 0.13   | <0.001<br><0.001             |
| OPD                                                                                                                                         | 19.4<br>(14)  | 9.0<br>(6)   | 6.3<br>(4)   | 6.4<br>(4)   | 3.2<br>(2)  | 3.3<br>(2)   | 5.0<br>(3)   | 1.7<br>(1)  | 0.0<br>(0)  |                          |                            |                              |
| <b>Quasi Delusions</b>                                                                                                                      |               |              |              |              |             |              |              |             |             |                          |                            |                              |
| BPD                                                                                                                                         | 48.6<br>(141) | 25.8<br>(71) | 25.7<br>(69) | 14.8<br>(39) | 5.5<br>(14) | 3.6<br>(9)   | 7.0<br>(17)  | 4.2<br>(10) | 6.1<br>(14) | 3.63<br>0.06             | 2.26, 5.82<br>0.04, 0.08   | <0.001<br><0.001             |
| OPD                                                                                                                                         | 15.3<br>(11)  | 6.0<br>(4)   | 1.6<br>(1)   | 6.4<br>(4)   | 1.6<br>(1)  | 1.6<br>(1)   | 3.3<br>(2)   | 1.7<br>(1)  | 0.0<br>(0)  |                          |                            |                              |
| <b>Quasi Hallucinations</b>                                                                                                                 |               |              |              |              |             |              |              |             |             |                          |                            |                              |
| BPD                                                                                                                                         | 41.0<br>(119) | 25.8<br>(71) | 20.1<br>(54) | 11.4<br>(30) | 7.1<br>(18) | 6.8<br>(17)  | 6.2<br>(15)  | 4.2<br>(10) | 3.5<br>(8)  | 3.87<br>0.06             | 2.15, 6.97<br>0.04, 0.10   | <0.001<br><0.001             |
| OPD                                                                                                                                         | 9.7<br>(7)    | 6.0<br>(4)   | 4.7<br>(3)   | 3.2<br>(2)   | 3.2<br>(2)  | 3.3<br>(2)   | 1.7<br>(1)   | 1.7<br>(1)  | 0.0<br>(0)  |                          |                            |                              |

| Table 5: Prevalence of True-Psychotic Thought in Borderline Patients and Axis II Comparison Subject over 16 Years of Prospective Follow-up |             |            |             |            |            |             |             |             |            |                          |                            |                              |
|--------------------------------------------------------------------------------------------------------------------------------------------|-------------|------------|-------------|------------|------------|-------------|-------------|-------------|------------|--------------------------|----------------------------|------------------------------|
|                                                                                                                                            | BL          | 2 YR FU    | 4 YR FU     | 6 YR FU    | 8 YR FU    | 10 YR FU    | 12 YR FU    | 14 YR FU    | 16 YR FU   | RRR<br>Diagnosis<br>Time | 95%CI<br>Diagnosis<br>Time | P-value<br>Diagnosis<br>Time |
| <b>Any True-psychotic Thought</b>                                                                                                          |             |            |             |            |            |             |             |             |            |                          |                            |                              |
| BPD                                                                                                                                        | 3.8<br>(11) | 1.1<br>(3) | 6.0<br>(16) | 2.3<br>(6) | 1.2<br>(3) | 5.6<br>(14) | 5.7<br>(14) | 6.7<br>(16) | 1.7<br>(4) | 5.18<br>1.49             | 1.94, 13.9<br>0.81, 2.76   | 0.001<br>NS                  |
| OPD                                                                                                                                        | 0.0<br>(0)  | 0.0<br>(0) | 1.6<br>(1)  | 3.2<br>(2) | 0.0<br>(0) | 0.0<br>(0)  | 0.0<br>(0)  | 1.7<br>(1)  | 0.0<br>(0) |                          |                            |                              |
| <b>True Delusions</b>                                                                                                                      |             |            |             |            |            |             |             |             |            |                          |                            |                              |
| BPD                                                                                                                                        | 3.5<br>(10) | 0.7<br>(2) | 4.8<br>(13) | 1.1<br>(3) | 0.4<br>(1) | 3.6<br>(9)  | 4.4<br>(10) | 5.9<br>(14) | 0.9<br>(2) | 7.82<br>1.36             | 1.92, 31.8<br>0.63, 2.96   | NS<br>NS                     |
| OPD                                                                                                                                        | 0.0<br>(0)  | 0.0<br>(0) | 1.6<br>(1)  | 0.0<br>(0) | 0.0<br>(0) | 0.0<br>(0)  | 0.0<br>(0)  | 1.7<br>(1)  | 0.0<br>(0) |                          |                            |                              |
| <b>True Hallucinations</b>                                                                                                                 |             |            |             |            |            |             |             |             |            |                          |                            |                              |
| BPD                                                                                                                                        | 2.1<br>(6)  | 0.4<br>(1) | 3.7<br>(10) | 1.9<br>(5) | 0.8<br>(2) | 4.8<br>(12) | 4.1<br>(10) | 2.1<br>(5)  | 1.7<br>(4) | 4.24<br>1.42             | 1.34, 13.45<br>0.68, 2.95  | 0.014<br>NS                  |
| OPD                                                                                                                                        | 0.0<br>(0)  | 0.0<br>(0) | 1.6<br>(1)  | 3.2<br>(2) | 0.0<br>(0) | 0.0<br>(0)  | 0.0<br>(0)  | 0.0<br>(0)  | 0.0<br>(0) |                          |                            |                              |
